# Supplementary material for: Water Quality Dynamics of Urban Water Bodies During Flooding in Can Tho City, Vietnam
Source: Preprints.org preprint supplement (doi:10.20944/preprints201703.0229.v1), 2017-03-31
Supplement: Supplementary file 1 [file supplementary]

## Supplement

This supplement elaborates on the detailed water quality measurement campaign conducted in Can Tho on 7 October 2013. These include 4 descriptive tables of water quality data and four processed figures of spatial and temporal variations of contaminants during flood event.

5

Table S1: Water quality parameters recorded in flood locations

|                       | Xang Thoi lake |    | Can Tho river | Rach Ngong canal | Hoa Binh avenue |    | Tran Van Kheo St. |    | Hai Ba Trung St. | Tran Ngoc Que St. | Phan Van Tri St. | Mau Than St. | Quang Trung St. |
|-----------------------|----------------|----|---------------|------------------|-----------------|----|-------------------|----|------------------|-------------------|------------------|--------------|-----------------|
| Water bodies          | SU             | SE | SU            | SU               | FL              | SE | FL                | SE | FL               | FL                | FL               | SE           |                 |
| BOD <sub>5</sub> 20°C | X              | X  | X             | X                | X               | X  | X                 | X  | X                | X                 | X                | X            | X               |
| Total P               | X              | X  | X             | X                | X               | X  | X                 | X  | X                | X                 | X                | X            | X               |
| Total N               | X              | X  | X             | X                | X               | X  | X                 | X  | X                | X                 | X                | X            | X               |
| E.Coli                | X              |    | X             | X                | X               |    | X                 |    | X                | X                 | X                |              |                 |
| Coliform              | X              | X  | X             | X                | X               | X  | X                 | X  | X                | X                 | X                | X            | X               |
| Salmonella            | X              | X  | X             | X                | X               | X  | X                 | X  | X                | X                 | X                | X            | X               |
| Water level           | X              |    |               |                  |                 |    | X                 |    |                  | X                 | X                | X            | X               |
| Sample                | 3              | 3  | 3             | 3                | 3               | 3  | 4                 | 3  | 5                | 5                 | 3                | 3            |                 |

SU: Open/Surface water, SE: Sewer Water, FL: Flood water

Table S2: Water quality analytical methods

| ID | Parameters               | Units     | Analytical Methods                      |
|----|--------------------------|-----------|-----------------------------------------|
| 1. | BOD <sub>5</sub> at 20°C | mg/l      | Oxitop meter <sup>1</sup>               |
| 2. | Total Nitrogen           | mg/l      | 10071/DR 3900 <sup>2</sup>              |
| 3. | Total Phosphorus         | mg/l      | 10127/DR 3900 <sup>3</sup>              |
| 4. | Salmonella               | MPN/100ml | Most probable number (MPN) <sup>4</sup> |
| 5. | E.coli                   | MPN/100ml | MPN                                     |
| 6. | Total Coliform           | MPN/100ml | MPN                                     |

10

<sup>1</sup> <https://www.wtw.com/en/products/product-categories/benchtop-meters/oxitopr-measuring-systems/oxitopr-is.html> (accessed 27 Mar. 2017)

<sup>2</sup> <https://www.hach.com/tensette-sup-sup-pipet-1-0-10-ml/product-downloads?id=7640447374> (search 10071, accessed 27 Mar. 2017)

<sup>3</sup> <https://www.hach.com/tensette-sup-sup-pipet-1-0-10-ml/product-downloads?id=7640447374> (search 10127, accessed 27 Mar. 2017)

<sup>4</sup> [http://www.who.int/water\\_sanitation\\_health/resourcesquality/wqmchap10.pdf](http://www.who.int/water_sanitation_health/resourcesquality/wqmchap10.pdf)

Table S3: Characteristics at flooded sites

|                                     | Tran Van Kheo Str. | Phan Van Tri St. | Quang Trung St. |
|-------------------------------------|--------------------|------------------|-----------------|
| <b>Rising time <sup>(*)</sup></b>   | 15:00              | 19:00            | 15:00           |
| <b>Time to Peak <sup>(*)</sup></b>  | 19:30              | 20:30            | 19:30           |
| <b>Receding time <sup>(*)</sup></b> | 20:15              | 21:30            | 21:00           |
| <b>Maximum levels (cm)</b>          | 22                 | 13               | 42              |

(<sup>\*</sup>): Referred as “High”, “Peak” and “Low” respectively in **Error! Reference source not found.**

Table S4: Descriptive statistics of water data

|                          |                     | n  | mean | sd   | median | min  | max  |
|--------------------------|---------------------|----|------|------|--------|------|------|
| <b>Flood water</b>       |                     |    |      |      |        |      |      |
| <b>BOD</b>               | mg/l                | 15 | 24.8 | 13.4 | 23.0   | 6.0  | 45.0 |
| <b>P</b>                 | mg/l                | 15 | 0.5  | 0.3  | 0.5    | 0.1  | 1.1  |
| <b>N</b>                 | mg/l                | 14 | 6.4  | 6.6  | 3.4    | 1.4  | 22.8 |
| <b><i>E.Coli</i></b>     | Log (10), MPN/100mL | 20 | 4.3  | 4.3  | 4.0    | 3.2  | 4.8  |
| <b>Coliform</b>          | Log (10), MPN/100mL | 20 | 5.8  | 5.7  | 5.7    | 4.0  | 6.3  |
| <b><i>Salmonella</i></b> | Log (10), MPN/100mL | 20 | 3.1  | 3.3  | 2.8    | 2.1  | 4.0  |
| <b>Sewer water</b>       |                     |    |      |      |        |      |      |
| <b>BOD</b>               | mg/l                | 12 | 42.8 | 20.3 | 50.0   | 8.0  | 80.0 |
| <b>P</b>                 | mg/l                | 12 | 0.8  | 0.3  | 0.8    | 0.3  | 1.3  |
| <b>N</b>                 | mg/l                | 12 | 10.2 | 7.4  | 7.6    | 4.7  | 30.4 |
| <b>Coliform</b>          | Log (10), MPN/100mL | 12 | 7.2  | 7.5  | 6.2    | 4.0  | 8.0  |
| <b><i>Salmonella</i></b> | Log (10), MPN/100mL | 12 | 3.4  | 3.4  | 3.1    | 2.3  | 4.0  |
| <b>Surface water</b>     |                     |    |      |      |        |      |      |
| <b>BOD</b>               | mg/l                | 9  | 33.0 | 5.7  | 34.0   | 22.0 | 39.0 |
| <b>P</b>                 | mg/l                | 9  | 0.4  | 0.1  | 0.3    | 0.3  | 0.7  |
| <b>N</b>                 | mg/l                | 9  | 2.5  | 1.5  | 2.3    | 0.4  | 4.6  |
| <b><i>E.Coli</i></b>     | Log (10), MPN/100mL | 9  | 3.5  | 3.2  | 3.5    | 2.3  | 3.8  |
| <b>Coliform</b>          | Log (10), MPN/100mL | 9  | 5.3  | 5.1  | 5.2    | 4.3  | 5.5  |
| <b><i>Salmonella</i></b> | Log (10), MPN/100mL | 9  | 3.4  | 3.7  | 3.0    | 2.4  | 4.2  |

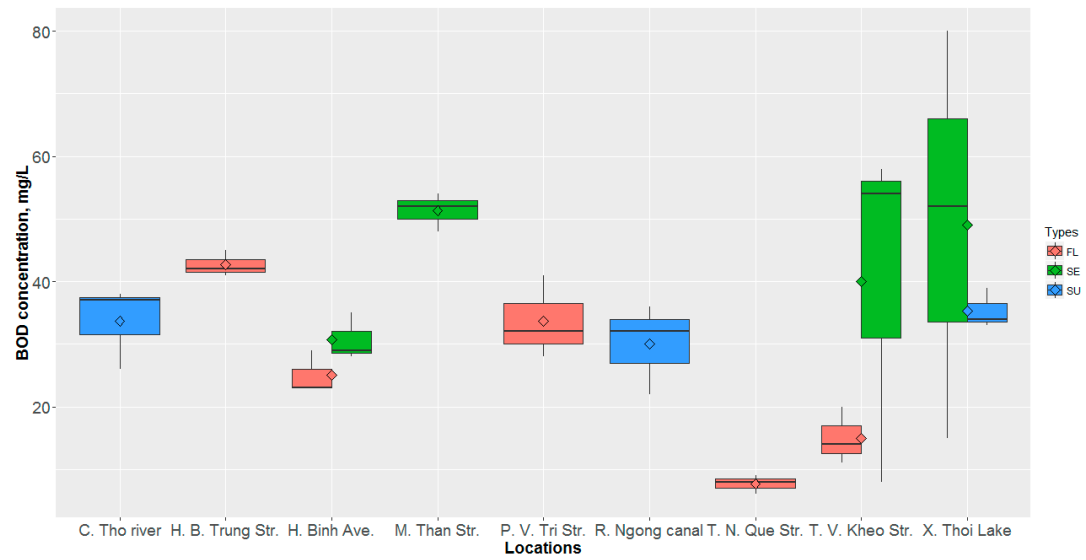

(a)

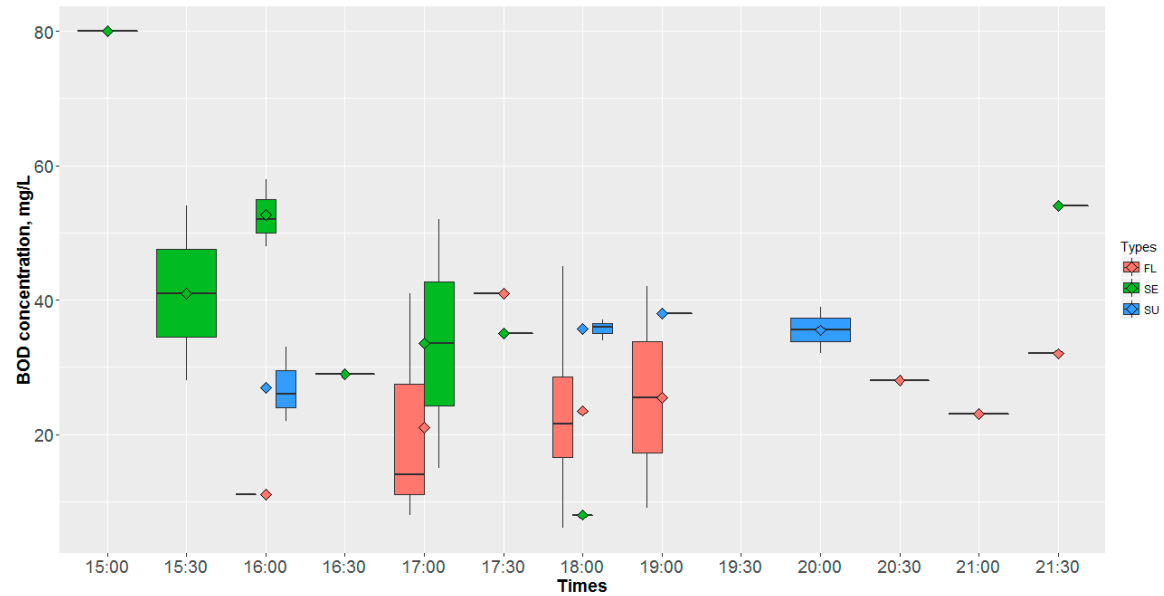

(b)

Figure S1: Box plot of variations of BOD concentration during flood event Locations (a), Time (b) (SU: Open/Surface water, SE: Sewer Water, FL: Flood water; the diamond symbols representing average values)

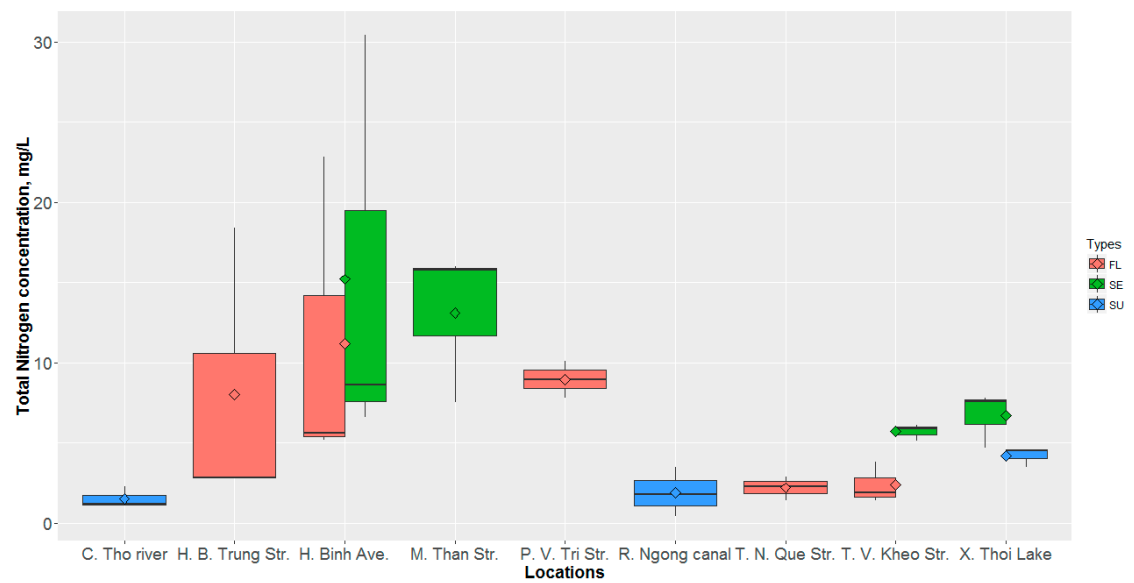

(a)

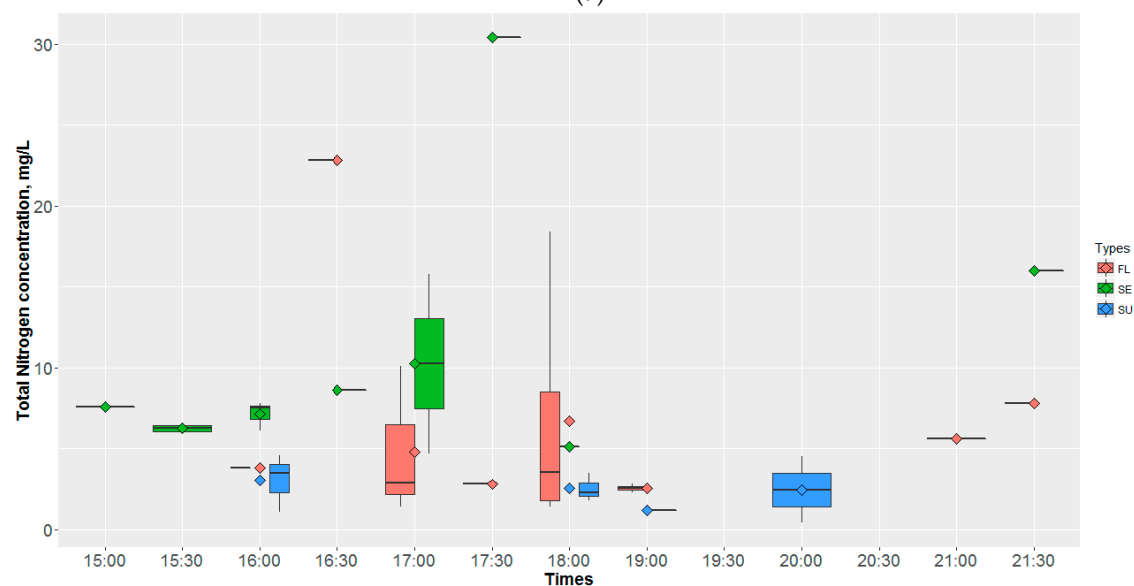

(b)

Figure S2: Box plot of variations of Total Nitrogen concentration during flood event Locations (a), Time (b) (SU: Open/Surface water, SE: Sewer Water, FL: Flood water; the diamond symbols representing average values)

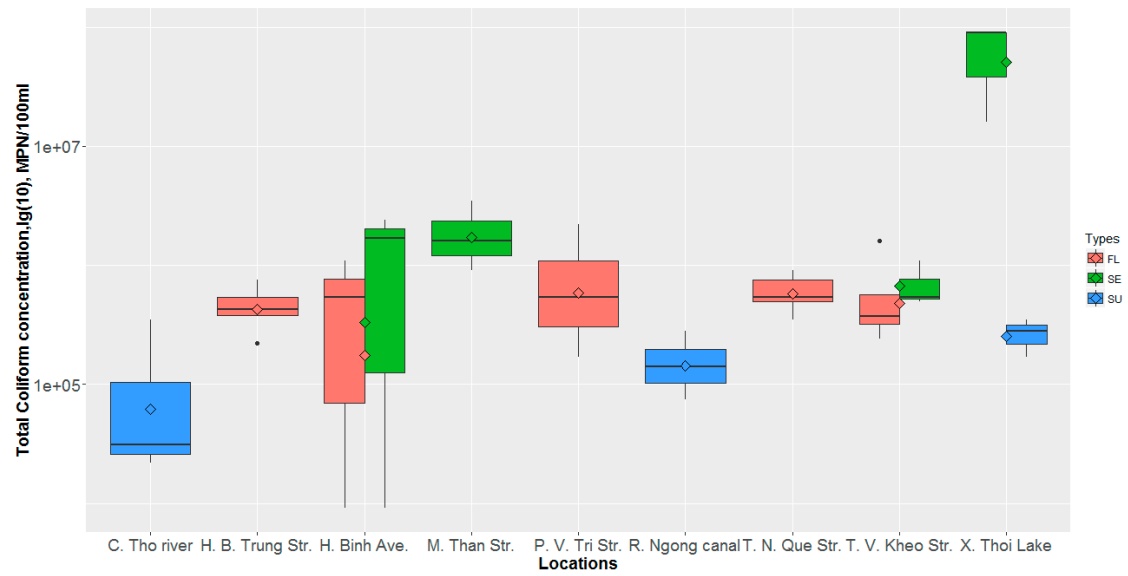

(a)

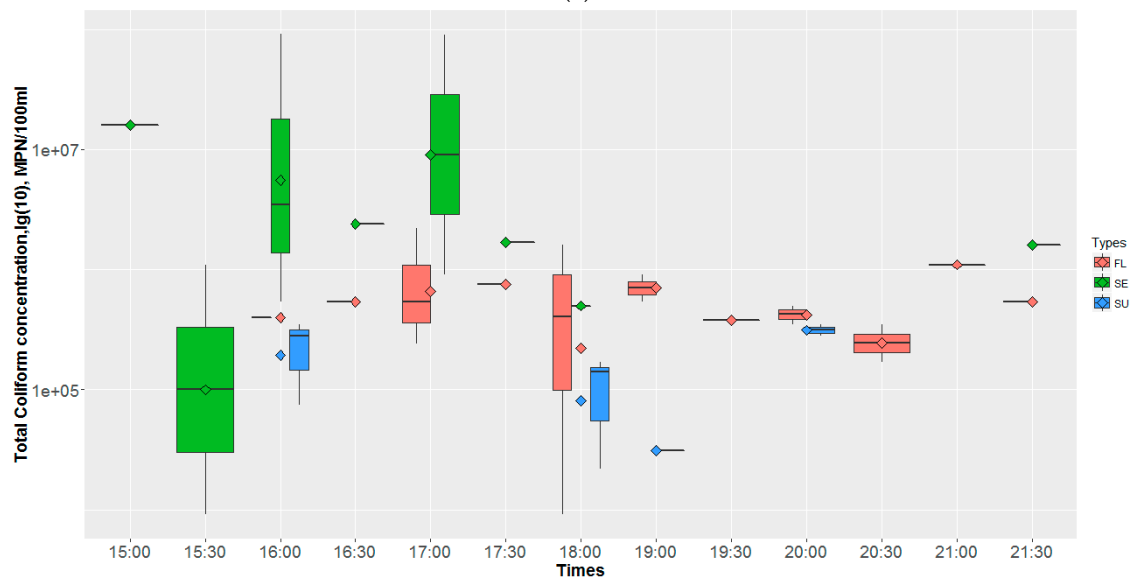

(b)

Figure S3: Box plot of variations of Total Coliform concentration during flood event Locations (a), Time (b) (SU: Open/Surface water, SE: Sewer Water, FL: Flood water; the diamond symbols representing average values)

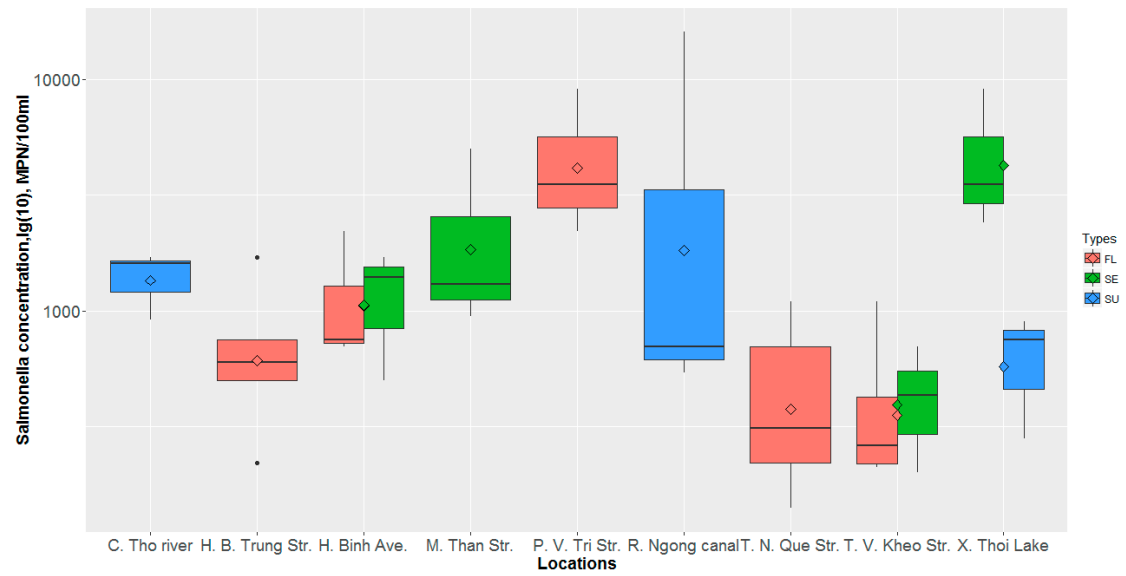

(a)

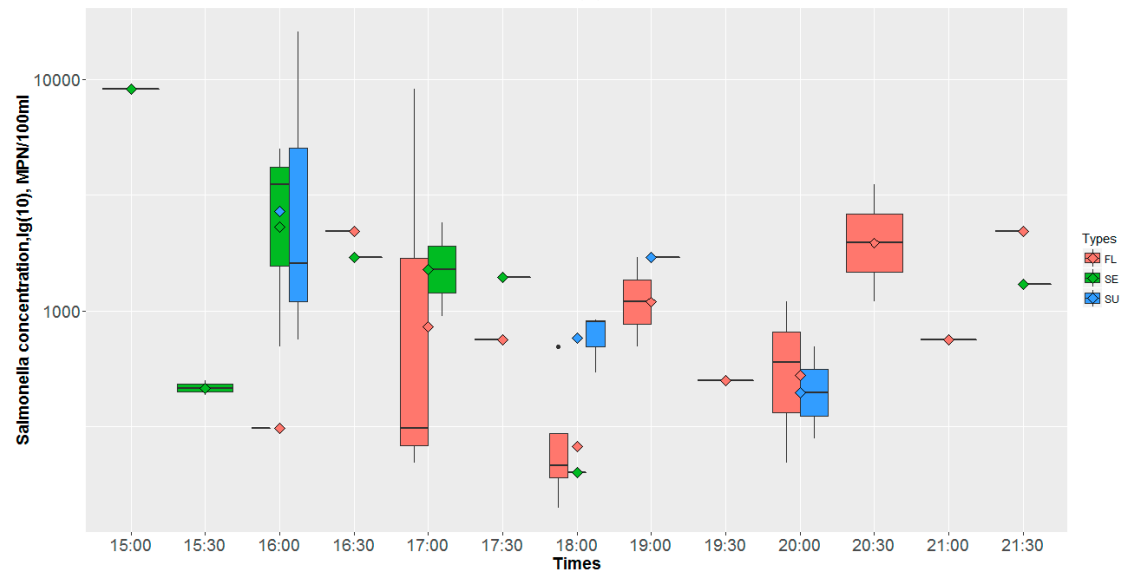

(b)

25 Figure S4: Box plot of variations of *Salmonella* concentration during flood event Locations (a), Time (b) (SU: Open/Surface water, SE: Sewer Water, FL: Flood water; the diamond symbols representing average values)
